# Supplementary material for: Validity and reliability of the Modified Tardieu Scale as a spasticity outcome measure of the upper limbs in adults with neurological conditions: a systematic review and narrative analysis
Source: HighWire-hosted journal article supplement (doi:10.1136/bmjopen-2021-050711), 2021-12-01
Supplement: bmjopen-2021-050711supp001_data_supplement.pdf [file bmjopen-2021-050711supp001_data_supplement.pdf]

## Appendix 1 Full Search Strategy in All Searched Databases

Keywords:

Population:

(stroke or “cerebrovascular accident\*” or “cerebro vascular accident\*” or “cerebral vascular event\*” or cva or cve) OR (stroke [MeSh] (where possible) OR

(“spinal cord injur\*” or “spinal injur\*” or sci) OR (spinal cord injuries [MeSH]) (where possible) OR

(“brain injur\*” or “head injur\*” or “traumatic brain injur\*” or “acquired brain injur\*” or tbi) OR (brain injuries [MeSh]) (where possible) OR

(“multiple sclerosis” or ms) OR (multiple sclerosis [MeSh]) (where possible) OR

(disability\* or disabled) OR (disabilities [MeSh])(where possible) AND

Intervention (action): “Modified Tardieu Scale” AND

Outcome: (spasticity or hypertonia or spasm) OR (spasticity [MeSh]) (where possible)

Pubmed/Medline:

| Number | Search                                                                                                                                                                                                               |
|--------|----------------------------------------------------------------------------------------------------------------------------------------------------------------------------------------------------------------------|
| #1     | “Modified Tardieu Scale” [Text Word]                                                                                                                                                                                 |
| #2     | "Stroke"[Text Word] OR "cerebrovascular accident*" [Text Word] OR "cerebro vascular accident*" [Text Word] OR "cva"[Text Word] OR "cerebral vascular event*" [Text Word] OR "cve"[Text Word] OR "Stroke"[MeSH Terms] |
| #3     | "Brain Injuries"[MeSH Terms] OR "brain injur*" [Text Word] OR "head injur*" [Text Word] OR "traumatic brain injur*" [Text Word] OR "acquired brain injur*" [Text Word] OR "tbi"[Text Word] OR "abi"[Text Word]       |
| #4     | "Spinal Cord Injuries"[MeSH Terms] OR "spinal cord injur*" [Text Word] OR "sci"[Text Word] OR "spinal injur*" [Text Word]                                                                                            |
| #5     | "Multiple Sclerosis"[MeSH Terms] OR "Multiple Sclerosis"[Text Word] OR "ms"[Text Word]                                                                                                                               |
| #6     | "disabilit*" [Text Word] OR "disabled"[Text Word] OR "Disability Studies"[MeSH Terms] OR "Physician Impairment"[MeSH Terms]                                                                                          |
| #7     | #2 OR #3 OR #4 OR #5 OR #6                                                                                                                                                                                           |
| #8     | "Muscle Spasticity"[MeSH Terms] OR "spasticity"[Text Word] OR "hypertonia"[Text Word] OR "spasm"[Text Word]                                                                                                          |
| #9     | #1 AND # 7 AND #8                                                                                                                                                                                                    |
| #10    | Limits: End date: 2020.12.31                                                                                                                                                                                         |

## CINAHL PLUS:

| Number | Search Terms                                                                                                         | Search options                                                             |
|--------|----------------------------------------------------------------------------------------------------------------------|----------------------------------------------------------------------------|
| S1     | TX“Modified Tardieu Scale”                                                                                           | Search modes:<br>Boolean/Phrase<br>Expanders: Apply<br>equivalent subjects |
| S2     | TX stroke or "cerebrovascular accident*" or "cerebro vascular accident*" or cva or “cerebral vascular event*” or cve |                                                                            |
| S3     | (MH “Stroke+”)                                                                                                       |                                                                            |
| S4     | S1 OR S2                                                                                                             |                                                                            |
| S5     | TX “spinal cord injur*” or sci or “spinal injur*”                                                                    |                                                                            |
| S6     | (MH “Spinal Cord Injuries+”) OR (MH “ Spinal Injuries+”)                                                             |                                                                            |
| S7     | S5 OR S6                                                                                                             |                                                                            |
| S8     | TX “Brain injur*” or “head injur*” or “traumatic brain injur*” or “acquired brain injur*” or tbi or abi              |                                                                            |
| S9     | (MH “Brain Injuries”)                                                                                                |                                                                            |
| S10    | S8 OR S9                                                                                                             |                                                                            |
| S11    | TX “Multiple sclerosis” or ms                                                                                        |                                                                            |
| S12    | (MH “Multiple Sclerosis+”)                                                                                           |                                                                            |
| S13    | S11 OR S12                                                                                                           |                                                                            |
| S14    | TX Disabilit* or disabled                                                                                            |                                                                            |
| S15    | (MH “Disability Management”) OR (MH “Disability Evaluation+”)                                                        |                                                                            |
| S16    | S14 OR 15                                                                                                            |                                                                            |
| S17    | S4 OR S7 OR S10 OR S13 OR 16                                                                                         |                                                                            |
| S18    | TX Spasticity or hypertonia or spasm                                                                                 |                                                                            |
| S19    | (MH “Muscle Spasticity”)                                                                                             |                                                                            |
| S20    | S18 OR S19                                                                                                           |                                                                            |
| S21    | S1 AND S17 AND S20                                                                                                   |                                                                            |
| S22    | Limit: Publication Year: -2020                                                                                       |                                                                            |

## EMBASE:

| Number | Searches                                                                                                                |
|--------|-------------------------------------------------------------------------------------------------------------------------|
| 1      | “Modified Tardieu Scale” .tw.                                                                                           |
| 2      | (stroke or "cerebrovascular accident*" or "cerebro vascular accident*" or cva or "cerebral vascular event*" or cve).tw. |
| 3      | stroke.mp. or exp cerebrovascular accident/                                                                             |
| 4      | 2 OR 3                                                                                                                  |
| 5      | ("spinal cord injur*" or "spinal injur*" or sci).tw.                                                                    |
| 6      | spinal cord injury.mp. or exp spinal cord injury/                                                                       |
| 7      | 5 OR 6                                                                                                                  |
| 8      | ("brain injur*" or "head injur*" or "traumatic brain injur*" or "acquired brain injur*" or tbi or abi).tw.              |
| 9      | brain injury.mp. or exp brain injury/                                                                                   |
| 10     | 8 OR 9                                                                                                                  |
| 11     | ("multiple sclerosis" or ms).tw.                                                                                        |
| 12     | multiple sclerosis.mp. or exp multiple sclerosis/                                                                       |
| 13     | 11 OR 12                                                                                                                |
| 14     | (disabilit* or disabled).tw.                                                                                            |
| 15     | exp disability/                                                                                                         |
| 16     | 14 OR 15                                                                                                                |
| 17     | 4 OR 7 OR 10 OR 13 OR 16                                                                                                |
| 18     | (spasticity or hypertonia or spasm).tw.                                                                                 |
| 19     | spasticity.mp. or exp spasticity/                                                                                       |
| 20     | 18 OR 19                                                                                                                |
| 21     | 1 AND 17 AND 20<br>Limits: Specific year range: to 2020                                                                 |

## Cochrane Library:

| Number | Search                                                                                                                     | Limits/Filters                                                     |
|--------|----------------------------------------------------------------------------------------------------------------------------|--------------------------------------------------------------------|
| #1     | All text “Modified Tardieu Scale”                                                                                          |                                                                    |
| #2     | MeSH descriptor: [Stroke] explode all trees                                                                                |                                                                    |
| #3     | All text-Stroke or “cerebrovascular accident*” or “cerebro vascular accident*” or “cerebral vascular event*” or cva or cve |                                                                    |
| #4     | #2 or #3                                                                                                                   |                                                                    |
| #5     | MeSH descriptor: [Spinal Cord Injuries] explode all trees<br>OR [Spinal injuries] explode all trees                        |                                                                    |
| #6     | All text “spinal cord injur*” or “spinal injur*” or sci                                                                    |                                                                    |
| #7     | #5 OR #6                                                                                                                   |                                                                    |
| #8     | MeSH descriptor: [Brain injuries] explode all trees                                                                        |                                                                    |
| #9     | All text “brain injur*” or “head injur*” or “traumatic brain injur*” or “acquired brain injur*” or tbi or abi              |                                                                    |
| #10    | #8 or #9                                                                                                                   |                                                                    |
| #11    | MeSH descriptor: [Multiple Sclerosis] explore all trees                                                                    |                                                                    |
| #12    | All text “multiple sclerosis” or ms                                                                                        |                                                                    |
| #13    | #11 OR #12                                                                                                                 |                                                                    |
| #14    | MeSH descriptor: [Disability Evaluation] explode all trees                                                                 |                                                                    |
| #15    | All text Disabilit* or disabled                                                                                            |                                                                    |
| #16    | #14 OR #15                                                                                                                 |                                                                    |
| #20    | #4 OR #7 OR #10 OR #13 OR #16                                                                                              |                                                                    |
| #21    | MeSH descriptor: [Muscle spasticity] explode all trees                                                                     |                                                                    |
| #22    | All text Spasticity or hypertonia or spasm                                                                                 |                                                                    |
| #23    | #21 or #23                                                                                                                 |                                                                    |
| #24    | #23 AND #20 AND #1                                                                                                         | Limit: with<br>Cochrane library<br>publication date<br>to Dec 2020 |

## Web of Science:

| Set | Search                                                                                                                  |
|-----|-------------------------------------------------------------------------------------------------------------------------|
| #1  | ALL=("Modified Tardieu Scale")                                                                                          |
| #2  | ALL=(Stroke or "cerebrovascular accident*" or "cerebro vascular accident*" or "cerebral vascular event*" or cva or cve) |
| #3  | ALL=("spinal cord injur*" or "spinal injur*" or sci)                                                                    |
| #4  | ALL=("brain injur*" OR "head injur*" OR "traumatic brain injur*" OR "acquired brain injur*" OR tbi OR abi )             |
| #5  | ALL=("multiple sclerosis" OR ms)                                                                                        |
| #6  | ALL=(disabilit* or disabled)                                                                                            |
| #7  | #2 OR #3 OR #4 OR #5 OR #6                                                                                              |
| #8  | ALL=(spasticity OR hypertonia OR spasm)                                                                                 |
| #9  | #1 AND #7 AND #8                                                                                                        |
| #10 | Exclude—publication years(2021)                                                                                         |

## PEDro:

Abstract & Title: "Modified Tardieu Scale" "Spasticity"

Subdiscipline: neurology

When Searching: Match all search terms (AND)
